# Supplementary material for: Decline towards extinction of Mexico's vaquita porpoise (Phocoena sinus)
Source: R Soc Open Sci. 2019 Jul 31;6(7):190598. doi: 10.1098/rsos.190598 (PMC6689580; doi:10.1098/rsos.190598)
Supplement: Coordinates [file rsos190598supp14.csv]

x	y
-2.53005272382545	39.5005925359719
17.2583996511815	39.4845322116471
17.257636972047	45.2475642729352
30.2842036444756	45.2573997222406
30.3199619202134	19.2132614363299
21.08705275213	-7.61422
-2.577163	12.5700548947665
-2.53005272382545	39.5005925359719
