# Supplementary material for: Decline towards extinction of Mexico's vaquita porpoise (Phocoena sinus)
Source: R Soc Open Sci. 2019 Jul 31;6(7):190598. doi: 10.1098/rsos.190598 (PMC6689580; doi:10.1098/rsos.190598)
Supplement: Model summary specification [file rsos190598supp12.r]

outName <- paste("mixtureModel", format(Sys.Date(), "%Y%m%d"), " - ", sep="")

##################
# OUTPUT SUMMARIES
##################

##### save entire bugs() output as .RData file (can read-in later with 'load' command)
save(out, file=paste(outName, "bugsOut.RData", sep = ""))

##### save the MCMC parameter chains as separate .RData file
chains <- out$sims.list
save(chains, file = paste(outName, "paramChains.RData",sep=""))

##### write MCMC chain attributes to file
mcmc.out <- rbind(out$n.chains, out$n.iter, out$n.burnin, out$n.thin, out$n.keep, out$n.sims)
row.names(mcmc.out) <- c("nChains", "chainLength", "burnIn", "thin", "simsKeptPerChain", "totSimsKept")
write.table(mcmc.out, file=paste(outName, "mcmc.txt", sep = ""), quote = FALSE, col.names = FALSE)

##### write posterior summary table to file
write.csv(round(out$summary, 6), file = paste(outName, "posteriorSummary.csv", sep = ""), quote = FALSE)

##### write DIC info to file
dic.out <- cbind(out$DIC-out$pD, out$DIC - 2 * out$pD, out$pD, out$DIC)
colnames(dic.out) <- c("Dbar", "Dhat", "pD", "DIC")
write.csv(round(dic.out, 5), file = paste(outName,"dic.csv",sep = ""), quote = FALSE, row.names = FALSE)

#### MCMC diagnostics
geweke <- 2*(1 - pnorm(abs(geweke.diag(out$sims.list$mean.lam.geo.model)$z)))
heidel <- heidel.diag(out$sims.list$mean.lam.geo.model)
mcmc.se <- summary(as.mcmc(out$sims.list$mean.lam.geo.model)) # for MCMC standard error
capture.output(list("geweke" = geweke, "heidel" = heidel, "mcmc.se" = mcmc.se), file = paste(outName, "mcmcDiagnostics.txt", sep = ""))

#### annual lambdas
n.yrs <- nyrs

lamN.model <- list(lam1 = out$sims.list$N.model[, 2] / out$sims.list$N.model[, 1],
                   lam2 = out$sims.list$N.model[, 3] / out$sims.list$N.model[, 2],
                   lam3 = out$sims.list$N.model[, 4] / out$sims.list$N.model[, 3],
                   lam4 = out$sims.list$N.model[, 5] / out$sims.list$N.model[, 4],
                   lam5 = out$sims.list$N.model[, 6] / out$sims.list$N.model[, 5],
                   lam6 = out$sims.list$N.model[, 7] / out$sims.list$N.model[, 6],
                   lam7 = out$sims.list$N.model[, 8] / out$sims.list$N.model[, 7]
                   )
lambda.summary <- list(means = c(mean(lamN.model$lam1), mean(lamN.model$lam2), mean(lamN.model$lam3), mean(lamN.model$lam4), mean(lamN.model$lam5), mean(lamN.model$lam6), mean(lamN.model$lam7)), 
                       sd = c(sd(lamN.model$lam1), sd(lamN.model$lam2), sd(lamN.model$lam3), sd(lamN.model$lam4), sd(lamN.model$lam5), sd(lamN.model$lam6), sd(lamN.model$lam7)), 
                       quantiles.lam1 = c(quantile(lamN.model$lam1, c(0.025, 0.5, 0.975))), quantiles.lam2 = c(quantile(lamN.model$lam2, c(0.025, 0.5, 0.975))), 
                       quantiles.lam3 = c(quantile(lamN.model$lam3, c(0.025, 0.5, 0.975))), quantiles.lam4 =c(quantile(lamN.model$lam4, c(0.025, 0.5, 0.975))), 
                       quantiles.lam5 = c(quantile(lamN.model$lam5, c(0.025, 0.5, 0.975))), quantiles.lam6 =c(quantile(lamN.model$lam6, c(0.025, 0.5, 0.975))), 
                       quantiles.lam7 = c(quantile(lamN.model$lam7, c(0.025, 0.5, 0.975)))  
                       ) 
capture.output(lambda.summary, file = paste(outName, "annualLambdas.txt", sep = ""))

# inference about mean lambda
p.lambdaLessThan1 <- sum(out$sims.list$mean.lam.geo.model < 1) / length(out$sims.list$mean.lam.geo.model)
p.lambdaLessThan0.8 <- sum(out$sims.list$mean.lam.geo.model < 0.8) / length(out$sims.list$mean.lam.geo.model)
capture.output(list("Prob(lam<1)" = p.lambdaLessThan1, "prob(lam<0.8)" = p.lambdaLessThan0.8), file = paste(outName, "probNegGrowth.txt", sep = ""))


########################################
# PLOTS OF OBSERVED VS. FITTED ESTIMATES
########################################

sites.pos <- rownames(effort.positiveEffort)   # sites sampled in at least one year, for plot labeling
cpue.pos <- clicks.positiveEffort / effort.positiveEffort
stratum <- round(apply(out$sims.list$st, 2, median), 0)

# Plots for estimates of detections/day at the detector locations

plot.obsVfit <- function(metric, theta, fit, numStrata, stratum, cpue.pos, 
  dpue.pos, dataType, MCMClength, st, effort){  
  # metric = "dphh" or "clicks"
  # fit="fitY" (inference on fitted vals) or "fitN" (inference on exact values), Panel prefers 'fitY'
  # dataType = "counts" or "clicks.per.day"

  if(metric == "dphh"){
    y.label <- "DPHH/day"
    y.max <- c(15, 10)
    # mpue <- metric per unit effort
    mpue.pos <- dpue.pos
  } 
  if(metric == "clicks"){
    y.label <- "Clicks/day"
    y.max <- c(4000, 1000)
    mpue.pos <- cpue.pos
  }
  
  mean.clicks.day <- array(NA, c(MCMClength, nsites.active, n.yrs))
  for(k in 1:nsites.active){
    for(t in 1:n.yrs){
      mean.clicks.day[, k, t] <- (theta[, 1, t] * sum(st[, k] == 1) + theta[, 2, t] * sum(st[, k] == 2) + theta[, 3, t] * sum(st[, k] == 3)) / MCMClength
    }
  }
  
  # set plotting params
  strata.colors <- c("red", "blue", "green", "gray", "purple")  # only nStrata are used
  # Do two plots, same data but with different y-axis ranges
  for(z in 1:2){  
    tiff(filename = paste(outName, "plot-obsd and pred_", fit, "_axis=", y.max[z], ".tif", sep = ""), height = 10, width = 10, units = "in", res = 300)
    par(mfrow = c(ceiling(n.yrs / 2), 2), mar = c(4, 5, 2, 3))
    for(t in 1:n.yrs){  # plot for each year
      plot(mpue.pos[, t], pch = 19, ylim = c(0, y.max[z]), xlab = "CPOD location", ylab = y.label, cex.lab = 2, cex.axis = 1.5, xaxt = "n", cex = 0.5 + (effort[, t] / mean(effort)) ^ 3)
      axis(side = 1, at = c(1:nsites.active), labels = sites.pos, cex.axis = 0.8)
      text(nsites.active / 2, y.max[z] * 0.95, t + 2010, adj = c(0.5, 0.5), cex = 2)
      for(s in 1:numStrata){
        if(dataType == "clicks.per.day"){
          errbar(c(1:nsites.active)[stratum == s],
          y <- apply(theta[, , t], 2, mean)[stratum == s],  
          yplus <- apply(theta[, , t], 2, quantile, 0.95)[stratum == s], 
          yminus <- apply(theta[, , t], 2, quantile, 0.05)[stratum == s],
          col <- strata.colors[s], errbar.col = strata.colors[s], cap = 0, add = TRUE, pch = 21, cex=3)
        } else if(dataType == "counts"){
          errbar(c(1:nsites.active)[stratum == s],
          y <- apply(mean.clicks.day[, , t], 2, mean)[stratum == s],  
          yplus <- apply(mean.clicks.day[, , t], 2, quantile, 0.95)[stratum == s], 
          yminus <- apply(mean.clicks.day[, , t], 2, quantile, 0.05)[stratum == s],
          col <- strata.colors[s], errbar.col = strata.colors[s], cap = 0, add = TRUE, pch = 21, cex = 3) 
        }
      }
      if(fit == "fitY") abline(h = mean(out$sims.list$N.model[, t])) else abline(h = mean(out$sims.list$N[, t]))
    }
    dev.off()
  }
} # end function

plot.obsVfit(metric = "clicks", theta = out$sims.list$theta.model, 
  fit = "fitY", bugs.data$numStrata, stratum, cpue.pos, dpue.pos, 
  dataType = "counts", MCMClength = out$n.sims, st = out$sims.list$st, 
  effort = bugs.data$effort)  

# Posterior predictive model check
# This takes the form of posterior simulations, from which p-values are 
#   calculated as proportion of simulations greater than or equal to the 
#   observed value - referred to by Gelman
#   et al (Bayesian Data Analysis 2014) as marginal predictive checks.
# The p.values are computed at three levels: by individual site and year,
#   by year aggregating over sites, and by site aggregating over year
marginal.pred.p.byyear.bysite <- matrix(NA, nyrs, nsites.active)
marginal.pred.p.byyear <- rep(NA, nyrs)
marginal.pred.p.bysite <- rep(NA, nsites.active)
post.pred <- array(dim=c(out$n.sims, nsites.active, nyrs))
for(i in 1:nyrs){
  for(j in 1:nsites.active){
    if(effort.positiveEffort[j, i] > 0) {
      for(k in 1:out$n.sims){
        post.pred[k, j, i] <- rnbinom(1, 
          out$sims.list$rnb[k, out$sims.list$st[k, j], i], 
          out$sims.list$pnb[k, j, i])   
      }
      marginal.pred.p.byyear.bysite[i, j] <- sum(post.pred [, j, i] >= clicks.positiveEffort[j, i])/out$n.sims
    }
  }
  ind <- effort.positiveEffort[, i] > 0
  year.sum <- apply(post.pred[, ind, i], 1, sum)
  marginal.pred.p.byyear[i] <- sum(year.sum >= sum(clicks.positiveEffort[ind, i]))/out$n.sims
}
for(j in 1:nsites.active) {
  ind <- effort.positiveEffort[j, ] > 0
  site.sum <- apply(post.pred[, j, ind], 1, sum)
  marginal.pred.p.bysite[j] <- sum(site.sum > sum(clicks.positiveEffort[j, ind]))/out$n.sims
}
save(marginal.pred.p.byyear.bysite, marginal.pred.p.byyear, marginal.pred.p.bysite, 
     file=paste(outName,"PosteriorPredictive.RData", sep=""))

##################################################################################
# PROJECT ABUNDANCE FROM THE 2015 VISUAL SURVEY ESTIMATE, OUT TO THE CURRENT YEAR
##################################################################################

# first, load function for generating N.2015 distribution
rlognorm <- function(nsims, mean, sd = NA, cv = NA){
  if(is.na(cv) == FALSE) varlog <- log(cv * cv + 1)
  if(is.na(sd) == FALSE) varlog <- log((sd / mean) ^ 2 + 1)
  mulog <- log(mean) - varlog / 2
  sdlog <- sqrt(varlog)
  data <- rlnorm(nsims,mulog, sdlog)
  return(data)
}
# 2015 abundance
n2015 <- rlognorm(10000, mean = 66, sd = 33)  # From Taylor et al. 2016, Cons Letters

# 2018 projected abundance
n2018 <- n2015 * lamN.model$lam5 * lamN.model$lam6 * lamN.model$lam7
N2018summary <- list(mean = mean(n2018), median = median(n2018), CI.95 = quantile(n2018, c(0.025, 0.975)))
capture.output(N2018summary, file = "N2018projected.txt")
