# Supplementary material for: Decline towards extinction of Mexico's vaquita porpoise (Phocoena sinus)
Source: R Soc Open Sci. 2019 Jul 31;6(7):190598. doi: 10.1098/rsos.190598 (PMC6689580; doi:10.1098/rsos.190598)
Supplement: Original dataset [file rsos190598supp3.xlsx]

## Sheet: Vaquita Acoustic Dataset 11-18
Site	Day	Clicks
1	2011-06-08	0
1	2011-06-09	0
1	2011-06-10	0
1	2011-06-11	0
1	2011-06-12	0
1	2011-06-13	0
1	2011-06-14	0
1	2011-06-15	0
1	2011-06-16	0
1	2011-06-17	0
1	2011-06-18	0
1	2011-06-19	0
1	2011-06-20	0
1	2011-06-21	0
1	2011-06-22	0
1	2011-06-23	0
1	2011-06-24	0
1	2011-06-25	0
1	2011-06-26	0
1	2011-06-27	0
1	2011-06-28	0
1	2011-06-29	0
1	2011-06-30	0
1	2011-07-01	0
1	2011-07-02	0
1	2011-07-03	0
1	2011-07-04	0
1	2011-07-05	0
1	2011-07-06	0
1	2011-07-07	0
1	2011-07-08	0
1	2011-07-09	0
1	2011-07-10	0
1	2011-07-11	0
1	2011-07-12	0
1	2011-07-13	0
1	2011-07-14	0
1	2011-07-15	0
1	2011-07-16	0
1	2011-07-17	0
1	2011-07-18	0
1	2011-07-19	0
1	2011-07-20	0
1	2011-07-21	0
1	2011-07-22	0
1	2011-07-23	0
1	2011-07-24	0
1	2011-07-25	0
1	2011-07-26	0
1	2011-07-27	0
1	2011-07-28	0
1	2011-07-29	0
1	2011-07-30	0
1	2011-07-31	0
1	2011-08-01	0
1	2011-08-02	0
1	2011-08-03	0
1	2011-08-04	0
1	2011-08-05	0
1	2011-08-06	0
1	2011-08-07	0
1	2011-08-08	0
1	2011-08-09	0
1	2011-08-10	9
1	2011-08-11	0
1	2011-08-12	0
1	2011-08-13	366
1	2011-08-14	0
1	2011-08-15	0
1	2011-08-16	0
1	2011-08-17	0
1	2011-08-18	0
1	2011-08-19	0
1	2011-08-20	0
1	2011-08-21	0
1	2011-08-22	0
1	2011-08-23	0
1	2011-08-24	0
1	2011-08-25	0
1	2011-08-26	0
1	2011-08-27	0
2	2011-06-08	0
2	2011-06-09	0
2	2011-06-10	0
2	2011-06-11	0
2	2011-06-12	0
2	2011-06-13	0
2	2011-06-14	0
2	2011-06-15	0
2	2011-06-16	0
2	2011-06-17	0
2	2011-06-18	0
2	2011-06-19	0
2	2011-06-20	0
2	2011-06-21	0
2	2011-06-22	0
2	2011-06-23	0
2	2011-06-24	0
2	2011-06-25	0
2	2011-06-26	0
2	2011-06-27	0
2	2011-06-28	24
2	2011-06-29	612
2	2011-06-30	0
2	2011-07-01	0
2	2011-07-02	0
2	2011-07-03	0
2	2011-07-04	0
2	2011-07-05	0
2	2011-07-06	0
2	2011-07-07	0
2	2011-07-08	0
2	2011-07-09	0
2	2011-07-10	0
2	2011-07-11	0
2	2011-07-12	159
2	2011-07-13	0
2	2011-07-14	304
2	2011-07-15	1196
2	2011-07-16	146
2	2011-07-17	665
2	2011-07-18	31
2	2011-07-19	31
2	2011-07-20	0
2	2011-07-21	0
2	2011-07-22	0
2	2011-07-23	0
2	2011-07-24	0
2	2011-07-25	0
2	2011-07-26	2016
2	2011-07-27	0
2	2011-07-28	1258
2	2011-07-29	0
3	2011-06-08	0
3	2011-06-09	0
3	2011-06-10	0
3	2011-06-11	0
3	2011-06-12	0
3	2011-06-13	0
3	2011-06-14	0
3	2011-06-15	0
3	2011-06-16	5
3	2011-06-17	0
3	2011-06-18	0
3	2011-06-19	0
3	2011-06-20	0
3	2011-06-21	0
3	2011-06-22	0
3	2011-06-23	0
3	2011-06-24	0
3	2011-06-25	0
3	2011-06-26	0
3	2011-06-27	0
3	2011-06-28	0
3	2011-06-29	0
3	2011-06-30	0
3	2011-07-01	0
3	2011-07-02	7
3	2011-07-03	0
3	2011-07-04	0
3	2011-07-05	0
3	2011-07-06	0
3	2011-07-07	0
3	2011-07-08	0
3	2011-07-09	0
3	2011-07-10	0
3	2011-07-11	0
3	2011-07-12	0
3	2011-07-13	0
3	2011-07-14	43
3	2011-07-15	71
3	2011-07-16	137
3	2011-07-17	1421
3	2011-07-18	112
3	2011-07-19	0
3	2011-07-20	0
3	2011-07-21	0
3	2011-07-22	0
3	2011-07-23	0
3	2011-07-24	0
3	2011-07-25	640
3	2011-07-26	0
3	2011-07-27	0
3	2011-07-28	0
3	2011-07-29	38
3	2011-07-30	44
3	2011-07-31	296
3	2011-08-01	0
3	2011-08-02	0
3	2011-08-03	0
3	2011-08-04	0
3	2011-08-05	56
3	2011-08-06	0
3	2011-08-07	0
3	2011-08-08	0
3	2011-08-09	43
3	2011-08-10	0
3	2011-08-11	486
3	2011-08-12	53
3	2011-08-13	10
3	2011-08-14	0
3	2011-08-15	0
3	2011-08-16	0
3	2011-08-17	35
3	2011-08-18	17
3	2011-08-19	0
3	2011-08-20	0
3	2011-08-21	788
3	2011-08-22	40
3	2011-08-23	255
3	2011-08-24	0
3	2011-08-25	0
3	2011-08-26	63
3	2011-08-27	0
3	2011-08-28	0
3	2011-08-29	813
3	2011-08-30	0
3	2011-08-31	0
3	2011-09-01	241
3	2011-09-02	0
3	2011-09-03	0
3	2011-09-04	1084
3	2011-09-05	54
4	2011-06-10	0
4	2011-06-11	0
4	2011-06-12	0
4	2011-06-13	0
4	2011-06-14	0
4	2011-06-15	0
4	2011-06-16	0
4	2011-06-17	0
4	2011-06-18	0
4	2011-06-19	0
4	2011-06-20	0
4	2011-06-21	0
4	2011-06-22	0
4	2011-06-23	0
4	2011-06-24	0
4	2011-06-25	0
4	2011-06-26	33
4	2011-06-27	0
4	2011-06-28	0
4	2011-06-29	0
4	2011-06-30	0
4	2011-07-01	0
4	2011-07-02	0
4	2011-07-03	0
4	2011-07-04	909
4	2011-07-05	124
4	2011-07-06	31
4	2011-07-07	0
4	2011-07-08	0
4	2011-07-09	0
4	2011-07-10	0
4	2011-07-11	0
4	2011-07-12	6
4	2011-07-13	205
4	2011-07-14	6
4	2011-07-15	7
4	2011-07-16	802
4	2011-07-17	214
4	2011-07-18	46
4	2011-07-19	364
4	2011-07-20	1020
4	2011-07-21	167
4	2011-07-22	0
4	2011-07-23	5
4	2011-07-24	5
4	2011-07-25	21
4	2011-07-26	233
4	2011-07-27	416
4	2011-07-28	538
4	2011-07-29	223
4	2011-07-30	304
4	2011-07-31	1085
4	2011-08-01	46
4	2011-08-02	481
4	2011-08-03	59
4	2011-08-04	0
4	2011-08-05	174
4	2011-08-06	864
4	2011-08-07	242
4	2011-08-08	0
4	2011-08-09	572
4	2011-08-10	136
4	2011-08-11	305
4	2011-08-12	144
4	2011-08-13	209
4	2011-08-14	1944
4	2011-08-15	139
4	2011-08-16	1645
4	2011-08-17	75
4	2011-08-18	0
4	2011-08-19	434
4	2011-08-20	11
4	2011-08-21	7
4	2011-08-22	313
4	2011-08-23	0
4	2011-08-24	171
4	2011-08-25	75
4	2011-08-26	5126
4	2011-08-27	231
4	2011-08-28	543
4	2011-08-29	755
4	2011-08-30	381
4	2011-08-31	814
4	2011-09-01	863
4	2011-09-02	1053
4	2011-09-03	451
4	2011-09-04	361
4	2011-09-05	318
4	2011-09-06	21
4	2011-09-07	7
4	2011-09-08	831
4	2011-09-09	18
4	2011-09-10	5
4	2011-09-11	71
4	2011-09-12	833
4	2011-09-13	617
4	2011-09-14	756
4	2011-09-15	40
4	2011-09-16	117
4	2011-09-17	415
5	2011-06-06	0
5	2011-06-07	0
5	2011-06-08	0
5	2011-06-09	0
5	2011-06-10	0
5	2011-06-11	0
5	2011-06-12	0
5	2011-06-13	0
5	2011-06-14	0
5	2011-06-15	0
5	2011-06-16	0
5	2011-06-17	0
5	2011-06-18	0
5	2011-06-19	0
5	2011-06-20	0
5	2011-06-21	0
5	2011-06-22	0
5	2011-06-23	0
5	2011-06-24	0
5	2011-06-25	0
5	2011-06-26	0
5	2011-06-27	0
5	2011-06-28	0
5	2011-06-29	0
5	2011-06-30	0
5	2011-07-01	0
5	2011-07-02	0
5	2011-07-03	0
5	2011-07-04	0
5	2011-07-05	0
5	2011-07-06	0
5	2011-07-07	0
5	2011-07-08	0
5	2011-07-09	0
5	2011-07-10	0
5	2011-07-11	0
5	2011-07-12	0
5	2011-07-13	0
5	2011-07-14	0
5	2011-07-15	0
5	2011-07-16	0
5	2011-07-17	0
5	2011-07-18	0
5	2011-07-19	0
5	2011-07-20	0
5	2011-07-21	0
5	2011-07-22	0
5	2011-07-23	0
5	2011-07-24	0
5	2011-07-25	0
5	2011-07-26	0
5	2011-07-27	0
5	2011-07-28	0
5	2011-07-29	0
5	2011-07-30	0
5	2011-07-31	0
5	2011-08-01	0
5	2011-08-02	0
5	2011-08-03	0
5	2011-08-04	0
5	2011-08-05	0
5	2011-08-06	0
5	2011-08-07	0
5	2011-08-08	0
5	2011-08-09	0
5	2011-08-10	0
5	2011-08-11	0
5	2011-08-12	0
5	2011-08-13	0
5	2011-08-14	0
5	2011-08-15	0
5	2011-08-16	0
5	2011-08-17	0
5	2011-08-18	0
5	2011-08-19	0
5	2011-08-20	0
5	2011-08-21	0
5	2011-08-22	0
5	2011-08-23	0
5	2011-08-24	0
5	2011-08-25	0
5	2011-08-26	0
5	2011-08-27	0
5	2011-08-28	0
5	2011-08-29	0
5	2011-08-30	0
5	2011-08-31	0
5	2011-09-01	0
5	2011-09-02	0
5	2011-09-03	0
5	2011-09-04	0
5	2011-09-05	0
5	2011-09-06	0
5	2011-09-07	0
6	2011-06-06	0
6	2011-06-07	0
6	2011-06-08	0
6	2011-06-09	0
6	2011-06-10	0
6	2011-06-11	0
6	2011-06-12	0
6	2011-06-13	0
6	2011-06-14	0
6	2011-06-15	0
6	2011-06-16	0
6	2011-06-17	0
6	2011-06-18	0
6	2011-06-19	0
6	2011-06-20	0
6	2011-06-21	0
6	2011-06-22	0
6	2011-06-23	0
6	2011-06-24	0
6	2011-06-25	0
6	2011-06-26	0
6	2011-06-27	9
6	2011-06-28	0
6	2011-06-29	0
6	2011-06-30	0
6	2011-07-01	0
6	2011-07-02	0
6	2011-07-03	0
6	2011-07-04	0
6	2011-07-05	0
6	2011-07-06	0
6	2011-07-07	0
6	2011-07-08	0
6	2011-07-09	0
6	2011-07-10	0
6	2011-07-11	0
6	2011-07-12	0
6	2011-07-13	0
6	2011-07-14	0
6	2011-07-15	0
6	2011-07-16	0
6	2011-07-17	0
6	2011-07-18	0
6	2011-07-19	0
6	2011-07-20	0
6	2011-07-21	0
6	2011-07-22	0
6	2011-07-23	0
6	2011-07-24	0
6	2011-07-25	0
6	2011-07-26	0
6	2011-07-27	0
6	2011-07-28	0
6	2011-07-29	0
6	2011-07-30	0
6	2011-07-31	0
6	2011-08-01	0
6	2011-08-02	0
6	2011-08-03	0
6	2011-08-04	0
6	2011-08-05	0
6	2011-08-06	0
6	2011-08-07	0
6	2011-08-08	0
6	2011-08-09	0
6	2011-08-10	0
6	2011-08-11	0
6	2011-08-12	0
6	2011-08-13	0
6	2011-08-14	0
6	2011-08-15	0
6	2011-08-16	0
6	2011-08-17	0
6	2011-08-18	0
6	2011-08-19	0
6	2011-08-20	0
6	2011-08-21	0
6	2011-08-22	0
6	2011-08-23	0
6	2011-08-24	0
6	2011-08-25	0
6	2011-08-26	0
6	2011-08-27	0
6	2011-08-28	0
6	2011-08-29	0
6	2011-08-30	0
6	2011-08-31	0
6	2011-09-01	0
6	2011-09-02	0
6	2011-09-03	0
7	2011-06-06	0
7	2011-06-07	0
7	2011-06-08	0
7	2011-06-09	0
7	2011-06-10	0
7	2011-06-11	0
7	2011-06-12	0
7	2011-06-13	0
7	2011-06-14	0
7	2011-06-15	0
7	2011-06-16	0
7	2011-06-17	0
7	2011-06-18	0
7	2011-06-19	0
7	2011-06-20	0
7	2011-06-21	0
7	2011-06-22	0
7	2011-06-23	0
7	2011-06-24	0
7	2011-06-25	0
7	2011-06-26	0
7	2011-06-27	0
7	2011-06-28	0
7	2011-06-29	0
7	2011-06-30	0
7	2011-07-01	0
7	2011-07-02	0
7	2011-07-03	0
7	2011-07-04	0
7	2011-07-05	0
7	2011-07-06	0
7	2011-07-07	0
7	2011-07-08	0
7	2011-07-09	0
7	2011-07-10	0
7	2011-07-11	0
7	2011-07-12	0
7	2011-07-13	0
7	2011-07-14	0
7	2011-07-15	0
7	2011-07-16	0
7	2011-07-17	0
7	2011-07-18	0
7	2011-07-19	305
7	2011-07-20	227
7	2011-07-21	0
7	2011-07-22	0
7	2011-07-23	0
7	2011-07-24	0
7	2011-07-25	0
7	2011-07-26	0
7	2011-07-27	0
7	2011-07-28	0
7	2011-07-29	0
7	2011-07-30	288
7	2011-07-31	1089
7	2011-08-01	217
7	2011-08-02	2207
7	2011-08-03	0
7	2011-08-04	457
7	2011-08-05	10
7	2011-08-06	0
7	2011-08-07	0
7	2011-08-08	20
7	2011-08-09	236
7	2011-08-10	0
7	2011-08-11	19
7	2011-08-12	0
7	2011-08-13	222
7	2011-08-14	704
7	2011-08-15	0
7	2011-08-16	0
7	2011-08-17	0
7	2011-08-18	0
7	2011-08-19	0
7	2011-08-20	3275
7	2011-08-21	158
7	2011-08-22	160
7	2011-08-23	121
7	2011-08-24	0
7	2011-08-25	0
7	2011-08-26	0
7	2011-08-27	0
7	2011-08-28	621
7	2011-08-29	1595
7	2011-08-30	477
7	2011-08-31	2610
9	2011-06-06	0
9	2011-06-07	0
9	2011-06-08	0
9	2011-06-09	0
9	2011-06-10	0
9	2011-06-11	0
9	2011-06-12	0
9	2011-06-13	0
9	2011-06-14	0
9	2011-06-15	0
9	2011-06-16	0
9	2011-06-17	0
9	2011-06-18	0
9	2011-06-19	0
9	2011-06-20	0
9	2011-06-21	0
9	2011-06-22	0
9	2011-06-23	0
9	2011-06-24	0
9	2011-06-25	0
9	2011-06-26	0
9	2011-06-27	0
9	2011-06-28	0
9	2011-06-29	0
9	2011-06-30	0
9	2011-07-01	0
9	2011-07-02	0
9	2011-07-03	0
9	2011-07-04	0
9	2011-07-05	0
9	2011-07-06	0
9	2011-07-07	0
9	2011-07-08	0
9	2011-07-09	0
9	2011-07-10	0
9	2011-07-11	0
9	2011-07-12	0
9	2011-07-13	0
9	2011-07-14	0
9	2011-07-15	0
9	2011-07-16	0
9	2011-07-17	0
9	2011-07-18	0
9	2011-07-19	0
9	2011-07-20	0
9	2011-07-21	0
9	2011-07-22	0
9	2011-07-23	0
9	2011-07-24	5
9	2011-07-25	0
9	2011-07-26	0
9	2011-07-27	0
9	2011-07-28	0
9	2011-07-29	313
9	2011-07-30	53
9	2011-07-31	0
9	2011-08-01	456
9	2011-08-02	357
9	2011-08-03	25
9	2011-08-04	10
9	2011-08-05	0
9	2011-08-06	0
9	2011-08-07	25
9	2011-08-08	219
9	2011-08-09	7
9	2011-08-10	0
9	2011-08-11	0
9	2011-08-12	0
9	2011-08-13	0
9	2011-08-14	0
9	2011-08-15	0
9	2011-08-16	0
9	2011-08-17	20
9	2011-08-18	0
9	2011-08-19	18
11	2011-06-06	0
11	2011-06-07	53
11	2011-06-08	0
11	2011-06-09	0
11	2011-06-10	0
11	2011-06-11	0
11	2011-06-12	0
11	2011-06-13	0
11	2011-06-14	0
11	2011-06-15	0
11	2011-06-16	0
11	2011-06-17	0
11	2011-06-18	0
11	2011-06-19	0
11	2011-06-20	0
11	2011-06-21	0
11	2011-06-22	0
11	2011-06-23	0
11	2011-06-24	0
11	2011-06-25	0
11	2011-06-26	0
11	2011-06-27	0
11	2011-06-28	0
11	2011-06-29	0
11	2011-06-30	0
11	2011-07-01	0
11	2011-07-02	0
11	2011-07-03	0
11	2011-07-04	0
11	2011-07-05	0
11	2011-07-06	0
11	2011-07-07	0
11	2011-07-08	0
11	2011-07-09	0
11	2011-07-10	0
11	2011-07-11	0
11	2011-07-12	0
11	2011-07-13	0
11	2011-07-14	0
11	2011-07-15	0
11	2011-07-16	0
11	2011-07-17	0
11	2011-07-18	0
11	2011-07-19	0
11	2011-07-20	0
11	2011-07-21	0
11	2011-07-22	0
11	2011-07-23	0
11	2011-07-24	0
11	2011-07-25	0
11	2011-07-26	0
11	2011-07-27	0
11	2011-07-28	0
11	2011-07-29	0
11	2011-07-30	0
11	2011-07-31	0
11	2011-08-01	0
11	2011-08-02	0
11	2011-08-03	0
11	2011-08-04	0
11	2011-08-05	0
11	2011-08-06	0
11	2011-08-07	0
11	2011-08-08	0
11	2011-08-09	23
11	2011-08-10	0
11	2011-08-11	0
11	2011-08-12	0
11	2011-08-13	0
11	2011-08-14	0
11	2011-08-15	0
11	2011-08-16	0
11	2011-08-17	0
11	2011-08-18	0
11	2011-08-19	21
11	2011-08-20	0
11	2011-08-21	0
11	2011-08-22	832
11	2011-08-23	15
11	2011-08-24	0
11	2011-08-25	0
11	2011-08-26	0
11	2011-08-27	0
11	2011-08-28	0
11	2011-08-29	0
11	2011-08-30	0
11	2011-08-31	0
11	2011-09-01	292
11	2011-09-02	0
11	2011-09-03	512
11	2011-09-04	0
11	2011-09-05	0
11	2011-09-06	0
11	2011-09-07	126
13	2011-06-08	0
13	2011-06-09	0
13	2011-06-10	0
13	2011-06-11	0
13	2011-06-12	0
13	2011-06-13	0
13	2011-06-14	0
13	2011-06-15	0
13	2011-06-16	0
13	2011-06-17	0
13	2011-06-18	0
13	2011-06-19	0
13	2011-06-20	0
13	2011-06-21	0
13	2011-06-22	0
13	2011-06-23	0
13	2011-06-24	0
13	2011-06-25	0
13	2011-06-26	0
13	2011-06-27	0
13	2011-06-28	0
13	2011-06-29	0
13	2011-06-30	0
13	2011-07-01	0
13	2011-07-02	0
13	2011-07-03	0
13	2011-07-04	0
13	2011-07-05	0
13	2011-07-06	0
13	2011-07-07	0
13	2011-07-08	0
13	2011-07-09	0
13	2011-07-10	0
13	2011-07-11	0
13	2011-07-12	0
13	2011-07-13	0
13	2011-07-14	0
13	2011-07-15	0
13	2011-07-16	0
13	2011-07-17	0
13	2011-07-18	0
13	2011-07-19	0
13	2011-07-20	0
13	2011-07-21	0
13	2011-07-22	0
13	2011-07-23	0
13	2011-07-24	0
13	2011-07-25	0
13	2011-07-26	0
13	2011-07-27	0
13	2011-07-28	0
13	2011-07-29	23
13	2011-07-30	0
13	2011-07-31	0
13	2011-08-01	0
13	2011-08-02	0
13	2011-08-03	0
13	2011-08-04	0
13	2011-08-05	0
13	2011-08-06	0
13	2011-08-07	0
13	2011-08-08	0
13	2011-08-09	0
13	2011-08-10	0
13	2011-08-11	0
13	2011-08-12	0
13	2011-08-13	0
13	2011-08-14	0
13	2011-08-15	0
14	2011-06-06	0
14	2011-06-07	0
14	2011-06-08	0
14	2011-06-09	0
14	2011-06-10	0
14	2011-06-11	0
14	2011-06-12	0
14	2011-06-13	14
14	2011-06-14	0
14	2011-06-15	0
14	2011-06-16	12
14	2011-06-17	263
14	2011-06-18	1054
14	2011-06-19	0
14	2011-06-20	1500
14	2011-06-21	34
14	2011-06-22	0
14	2011-06-23	0
14	2011-06-24	291
14	2011-06-25	341
14	2011-06-26	0
14	2011-06-27	337
14	2011-06-28	957
14	2011-06-29	0
14	2011-06-30	3972
14	2011-07-01	899
14	2011-07-02	5804
14	2011-07-03	3358
14	2011-07-04	4665
14	2011-07-05	3135
14	2011-07-06	8928
14	2011-07-07	147
14	2011-07-08	548
14	2011-07-09	669
14	2011-07-10	19
14	2011-07-11	568
14	2011-07-12	291
14	2011-07-13	1958
14	2011-07-14	1155
14	2011-07-15	2289
14	2011-07-16	1258
14	2011-07-17	3109
14	2011-07-18	1651
14	2011-07-19	2324
14	2011-07-20	3274
14	2011-07-21	973
14	2011-07-22	194
14	2011-07-23	0
14	2011-07-24	2597
14	2011-07-25	545
14	2011-07-26	2883
14	2011-07-27	1697
14	2011-07-28	917
14	2011-07-29	551
14	2011-07-30	1969
14	2011-07-31	2003
14	2011-08-01	2206
14	2011-08-02	2095
14	2011-08-03	4605
14	2011-08-04	2752
14	2011-08-05	2152
14	2011-08-06	634
14	2011-08-07	4244
14	2011-08-08	1921
14	2011-08-09	1926
14	2011-08-10	2855
14	2011-08-11	1854
14	2011-08-12	3768
14	2011-08-13	1962
14	2011-08-14	1525
14	2011-08-15	1022
15	2011-06-06	0
15	2011-06-07	0
15	2011-06-08	0
15	2011-06-09	63
15	2011-06-10	0
15	2011-06-11	0
15	2011-06-12	0
15	2011-06-13	0
15	2011-06-14	0
15	2011-06-15	0
15	2011-06-16	0
15	2011-06-17	0
15	2011-06-18	0
15	2011-06-19	0
15	2011-06-20	0
15	2011-06-21	0
15	2011-06-22	0
15	2011-06-23	0
15	2011-06-24	0
15	2011-06-25	38
15	2011-06-26	156
15	2011-06-27	0
15	2011-06-28	0
15	2011-06-29	0
15	2011-06-30	0
15	2011-07-01	0
15	2011-07-02	0
15	2011-07-03	0
15	2011-07-04	0
15	2011-07-05	0
15	2011-07-06	0
15	2011-07-07	0
15	2011-07-08	0
15	2011-07-09	0
15	2011-07-10	0
15	2011-07-11	0
15	2011-07-12	19
15	2011-07-13	990
15	2011-07-14	1229
15	2011-07-15	1035
15	2011-07-16	1347
15	2011-07-17	17
15	2011-07-18	6
15	2011-07-19	151
15	2011-07-20	95
15	2011-07-21	211
15	2011-07-22	363
15	2011-07-23	639
15	2011-07-24	297
15	2011-07-25	96
15	2011-07-26	0
15	2011-07-27	23
15	2011-07-28	0
15	2011-07-29	0
15	2011-07-30	84
15	2011-07-31	86
15	2011-08-01	0
15	2011-08-02	0
15	2011-08-03	41
15	2011-08-04	0
15	2011-08-05	0
15	2011-08-06	1102
15	2011-08-07	67
15	2011-08-08	0
15	2011-08-09	40
15	2011-08-10	662
15	2011-08-11	178
15	2011-08-12	0
15	2011-08-13	0
15	2011-08-14	77
16	2011-06-06	0
16	2011-06-07	0
16	2011-06-08	0
16	2011-06-09	0
16	2011-06-10	0
16	2011-06-11	0
16	2011-06-12	0
16	2011-06-13	166
16	2011-06-14	0
16	2011-06-15	0
16	2011-06-16	0
16	2011-06-17	150
16	2011-06-18	0
16	2011-06-19	411
16	2011-06-20	0
16	2011-06-21	0
16	2011-06-22	0
16	2011-06-23	0
16	2011-06-24	0
16	2011-06-25	247
16	2011-06-26	266
16	2011-06-27	0
16	2011-06-28	1787
16	2011-06-29	0
16	2011-06-30	19
16	2011-07-01	0
16	2011-07-02	0
16	2011-07-03	0
16	2011-07-04	0
16	2011-07-05	40
16	2011-07-06	0
16	2011-07-07	33
16	2011-07-08	0
16	2011-07-09	0
16	2011-07-10	0
16	2011-07-11	1638
16	2011-07-12	0
16	2011-07-13	689
16	2011-07-14	2148
16	2011-07-15	726
16	2011-07-16	1693
16	2011-07-17	759
16	2011-07-18	2524
16	2011-07-19	305
16	2011-07-20	0
16	2011-07-21	537
16	2011-07-22	60
16	2011-07-23	85
16	2011-07-24	1158
16	2011-07-25	679
16	2011-07-26	6
16	2011-07-27	322
16	2011-07-28	164
16	2011-07-29	99
16	2011-07-30	213
16	2011-07-31	2102
16	2011-08-01	3958
16	2011-08-02	2304
16	2011-08-03	3037
16	2011-08-04	363
16	2011-08-05	4075
16	2011-08-06	241
16	2011-08-07	466
16	2011-08-08	1436
16	2011-08-09	3149
16	2011-08-10	1879
16	2011-08-11	811
16	2011-08-12	338
16	2011-08-13	570
16	2011-08-14	170
16	2011-08-15	1119
16	2011-08-16	2810
16	2011-08-17	1667
16	2011-08-18	1606
16	2011-08-19	1396
16	2011-08-20	406
16	2011-08-21	512
16	2011-08-22	1131
16	2011-08-23	638
16	2011-08-24	2265
16	2011-08-25	2196
19	2011-06-08	0
19	2011-06-09	0
19	2011-06-10	2836
19	2011-06-11	7
19	2011-06-12	523
19	2011-06-13	51
19	2011-06-14	194
19	2011-06-15	438
19	2011-06-16	277
19	2011-06-17	182
19	2011-06-18	76
19	2011-06-19	0
19	2011-06-20	13
19	2011-06-21	17
19	2011-06-22	6
19	2011-06-23	110
19	2011-06-24	937
19	2011-06-25	138
19	2011-06-26	63
19	2011-06-27	1073
19	2011-06-28	3512
19	2011-06-29	2970
19	2011-06-30	97
19	2011-07-01	0
19	2011-07-02	6
19	2011-07-03	2547
19	2011-07-04	604
19	2011-07-05	229
19	2011-07-06	625
19	2011-07-07	0
19	2011-07-08	835
19	2011-07-09	435
19	2011-07-10	1935
19	2011-07-11	6236
19	2011-07-12	543
19	2011-07-13	603
19	2011-07-14	80
19	2011-07-15	0
19	2011-07-16	274
19	2011-07-17	844
19	2011-07-18	376
19	2011-07-19	198
19	2011-07-20	431
19	2011-07-21	301
19	2011-07-22	1601
19	2011-07-23	1776
19	2011-07-24	3454
19	2011-07-25	1011
19	2011-07-26	337
19	2011-07-27	102
19	2011-07-28	71
19	2011-07-29	356
19	2011-07-30	183
19	2011-07-31	0
19	2011-08-01	150
19	2011-08-02	0
19	2011-08-03	0
19	2011-08-04	1351
19	2011-08-05	1310
19	2011-08-06	1287
19	2011-08-07	1379
19	2011-08-08	683
19	2011-08-09	440
19	2011-08-10	228
19	2011-08-11	262
19	2011-08-12	193
19	2011-08-13	20
19	2011-08-14	353
19	2011-08-15	0
19	2011-08-16	58
19	2011-08-17	146
19	2011-08-18	206
19	2011-08-19	33
19	2011-08-20	1942
19	2011-08-21	1023
19	2011-08-22	0
19	2011-08-23	306
19	2011-08-24	1362
19	2011-08-25	907
19	2011-08-26	204
19	2011-08-27	253
19	2011-08-28	0
19	2011-08-29	24
19	2011-08-30	774
19	2011-08-31	427
19	2011-09-01	0
19	2011-09-02	11
19	2011-09-03	569
19	2011-09-04	65
19	2011-09-05	169
19	2011-09-06	550
19	2011-09-07	22
19	2011-09-08	816
20	2011-06-08	42
20	2011-06-09	0
20	2011-06-10	0
20	2011-06-11	420
20	2011-06-12	0
20	2011-06-13	168
20	2011-06-14	523
20	2011-06-15	162
20	2011-06-16	24
20	2011-06-17	307
20	2011-06-18	506
20	2011-06-19	891
20	2011-06-20	155
20	2011-06-21	275
20	2011-06-22	77
20	2011-06-23	59
20	2011-06-24	132
20	2011-06-25	452
20	2011-06-26	1892
20	2011-06-27	25
20	2011-06-28	440
20	2011-06-29	1273
20	2011-06-30	1477
20	2011-07-01	436
20	2011-07-02	3278
20	2011-07-03	224
20	2011-07-04	626
20	2011-07-05	243
20	2011-07-06	121
20	2011-07-07	107
20	2011-07-08	447
20	2011-07-09	74
20	2011-07-10	505
20	2011-07-11	8
20	2011-07-12	239
20	2011-07-13	529
20	2011-07-14	38
20	2011-07-15	41
20	2011-07-16	169
20	2011-07-17	929
20	2011-07-18	57
20	2011-07-19	0
20	2011-07-20	720
20	2011-07-21	810
20	2011-07-22	0
20	2011-07-23	0
20	2011-07-24	1185
20	2011-07-25	399
20	2011-07-26	142
20	2011-07-27	10
20	2011-07-28	182
20	2011-07-29	0
20	2011-07-30	73
20	2011-07-31	0
20	2011-08-01	731
20	2011-08-02	0
20	2011-08-03	0
20	2011-08-04	0
20	2011-08-05	0
20	2011-08-06	628
20	2011-08-07	31
20	2011-08-08	972
20	2011-08-09	163
20	2011-08-10	33
20	2011-08-11	0
20	2011-08-12	0
20	2011-08-13	347
20	2011-08-14	0
20	2011-08-15	514
20	2011-08-16	23
20	2011-08-17	54
20	2011-08-18	15
20	2011-08-19	414
21	2011-06-08	0
21	2011-06-09	0
21	2011-06-10	0
21	2011-06-11	182
21	2011-06-12	0
21	2011-06-13	832
21	2011-06-14	856
21	2011-06-15	0
21	2011-06-16	392
21	2011-06-17	0
21	2011-06-18	0
21	2011-06-19	24
21	2011-06-20	0
21	2011-06-21	0
21	2011-06-22	0
21	2011-06-23	0
21	2011-06-24	0
21	2011-06-25	0
21	2011-06-26	68
21	2011-06-27	0
21	2011-06-28	0
21	2011-06-29	0
21	2011-06-30	0
21	2011-07-01	0
21	2011-07-02	0
21	2011-07-03	0
21	2011-07-04	0
21	2011-07-05	0
21	2011-07-06	0
21	2011-07-07	0
21	2011-07-08	0
21	2011-07-09	0
21	2011-07-10	0
21	2011-07-11	0
21	2011-07-12	0
21	2011-07-13	0
21	2011-07-14	61
21	2011-07-15	178
21	2011-07-16	350
21	2011-07-17	47
21	2011-07-18	0
21	2011-07-19	30
21	2011-07-20	0
21	2011-07-21	0
21	2011-07-22	0
21	2011-07-23	211
21	2011-07-24	53
21	2011-07-25	37
21	2011-07-26	540
21	2011-07-27	175
21	2011-07-28	13
21	2011-07-29	0
21	2011-07-30	0
21	2011-07-31	0
21	2011-08-01	0
21	2011-08-02	0
21	2011-08-03	124
21	2011-08-04	0
21	2011-08-05	0
21	2011-08-06	0
21	2011-08-07	0
21	2011-08-08	0
21	2011-08-09	306
21	2011-08-10	0
21	2011-08-11	152
21	2011-08-12	129
21	2011-08-13	0
21	2011-08-14	0
21	2011-08-15	307
22	2011-06-08	0
22	2011-06-09	0
22	2011-06-10	0
22	2011-06-11	0
22	2011-06-12	0
22	2011-06-13	0
22	2011-06-14	0
22	2011-06-15	0
22	2011-06-16	0
22	2011-06-17	0
22	2011-06-18	0
22	2011-06-19	0
22	2011-06-20	0
22	2011-06-21	0
22	2011-06-22	0
22	2011-06-23	0
22	2011-06-24	0
22	2011-06-25	0
22	2011-06-26	0
22	2011-06-27	0
22	2011-06-28	0
22	2011-06-29	0
22	2011-06-30	0
22	2011-07-01	0
22	2011-07-02	0
22	2011-07-03	0
22	2011-07-04	0
22	2011-07-05	0
22	2011-07-06	0
22	2011-07-07	0
22	2011-07-08	0
22	2011-07-09	0
22	2011-07-10	0
22	2011-07-11	0
22	2011-07-12	0
22	2011-07-13	0
22	2011-07-14	0
22	2011-07-15	0
22	2011-07-16	0
22	2011-07-17	0
22	2011-07-18	0
22	2011-07-19	0
22	2011-07-20	0
22	2011-07-21	0
22	2011-07-22	0
22	2011-07-23	0
22	2011-07-24	0
22	2011-07-25	0
22	2011-07-26	0
22	2011-07-27	0
22	2011-07-28	0
22	2011-07-29	0
22	2011-07-30	0
22	2011-07-31	0
22	2011-08-01	0
22	2011-08-02	0
22	2011-08-03	0
22	2011-08-04	0
22	2011-08-05	0
22	2011-08-06	0
22	2011-08-07	0
22	2011-08-08	0
22	2011-08-09	0
22	2011-08-10	0
22	2011-08-11	0
22	2011-08-12	0
22	2011-08-13	0
22	2011-08-14	0
22	2011-08-15	0
22	2011-08-16	0
22	2011-08-17	0
22	2011-08-18	0
22	2011-08-19	0
22	2011-08-20	0
22	2011-08-21	0
22	2011-08-22	0
22	2011-08-23	0
22	2011-08-24	0
22	2011-08-25	0
23	2011-06-08	18
23	2011-06-09	0
23	2011-06-10	0
23	2011-06-11	0
23	2011-06-12	0
23	2011-06-13	13
23	2011-06-14	220
23	2011-06-15	0
23	2011-06-16	1149
23	2011-06-17	0
23	2011-06-18	0
23	2011-06-19	142
23	2011-06-20	0
23	2011-06-21	0
23	2011-06-22	0
23	2011-06-23	0
23	2011-06-24	0
23	2011-06-25	0
23	2011-06-26	344
23	2011-06-27	0
23	2011-06-28	0
23	2011-06-29	0
23	2011-06-30	0
23	2011-07-01	0
23	2011-07-02	0
23	2011-07-03	0
23	2011-07-04	0
23	2011-07-05	0
23	2011-07-06	0
23	2011-07-07	0
23	2011-07-08	0
23	2011-07-09	0
23	2011-07-10	0
23	2011-07-11	0
23	2011-07-12	0
23	2011-07-13	0
23	2011-07-14	0
23	2011-07-15	366
23	2011-07-16	0
23	2011-07-17	0
23	2011-07-18	0
23	2011-07-19	0
23	2011-07-20	0
23	2011-07-21	0
23	2011-07-22	0
23	2011-07-23	0
23	2011-07-24	0
23	2011-07-25	0
23	2011-07-26	97
23	2011-07-27	0
23	2011-07-28	192
23	2011-07-29	0
23	2011-07-30	0
23	2011-07-31	9
23	2011-08-01	0
23	2011-08-02	0
23	2011-08-03	0
23	2011-08-04	0
23	2011-08-05	0
23	2011-08-06	888
23	2011-08-07	181
23	2011-08-08	88
23	2011-08-09	0
23	2011-08-10	16
23	2011-08-11	0
23	2011-08-12	0
23	2011-08-13	0
23	2011-08-14	0
23	2011-08-15	0
23	2011-08-16	0
23	2011-08-17	0
23	2011-08-18	0
23	2011-08-19	0
23	2011-08-20	0
23	2011-08-21	0
23	2011-08-22	0
25	2011-06-08	0
25	2011-06-09	0
25	2011-06-10	0
25	2011-06-11	0
25	2011-06-12	0
25	2011-06-13	0
25	2011-06-14	0
25	2011-06-15	0
25	2011-06-16	0
25	2011-06-17	0
25	2011-06-18	0
25	2011-06-19	0
25	2011-06-20	0
25	2011-06-21	0
25	2011-06-22	0
25	2011-06-23	0
25	2011-06-24	0
25	2011-06-25	0
25	2011-06-26	0
25	2011-06-27	0
25	2011-06-28	0
25	2011-06-29	0
25	2011-06-30	0
25	2011-07-01	0
25	2011-07-02	0
25	2011-07-03	0
25	2011-07-04	0
25	2011-07-05	0
25	2011-07-06	0
25	2011-07-07	0
25	2011-07-08	0
25	2011-07-09	0
25	2011-07-10	0
25	2011-07-11	0
25	2011-07-12	0
25	2011-07-13	0
25	2011-07-14	0
25	2011-07-15	0
25	2011-07-16	0
25	2011-07-17	0
25	2011-07-18	0
25	2011-07-19	0
25	2011-07-20	0
25	2011-07-21	0
25	2011-07-22	0
25	2011-07-23	0
25	2011-07-24	0
25	2011-07-25	0
25	2011-07-26	0
25	2011-07-27	0
25	2011-07-28	0
25	2011-07-29	0
25	2011-07-30	0
25	2011-07-31	0
25	2011-08-01	0
25	2011-08-02	0
25	2011-08-03	0
25	2011-08-04	0
25	2011-08-05	0
25	2011-08-06	0
26	2011-06-03	0
26	2011-06-04	0
26	2011-06-05	0
26	2011-06-06	0
26	2011-06-07	0
26	2011-06-08	0
26	2011-06-09	0
26	2011-06-10	0
26	2011-06-11	0
26	2011-06-12	0
26	2011-06-13	0
26	2011-06-14	0
26	2011-06-15	0
26	2011-06-16	0
26	2011-06-17	0
26	2011-06-18	0
26	2011-06-19	0
26	2011-06-20	0
26	2011-06-21	0
26	2011-06-22	0
26	2011-06-23	0
26	2011-06-24	0
26	2011-06-25	0
26	2011-06-26	0
26	2011-06-27	0
26	2011-06-28	0
26	2011-06-29	0
26	2011-06-30	0
26	2011-07-01	0
26	2011-07-02	0
26	2011-07-03	0
26	2011-07-04	0
26	2011-07-05	0
26	2011-07-06	0
26	2011-07-07	0
26	2011-07-08	0
26	2011-07-09	0
26	2011-07-10	0
26	2011-07-11	0
26	2011-07-12	0
26	2011-07-13	0
26	2011-07-14	0
26	2011-07-15	0
26	2011-07-16	0
26	2011-07-17	0
26	2011-07-18	0
26	2011-07-19	0
26	2011-07-20	0
26	2011-07-21	0
26	2011-07-22	0
26	2011-07-23	0
26	2011-07-24	0
26	2011-07-25	0
26	2011-07-26	0
26	2011-07-27	0
26	2011-07-28	0
26	2011-07-29	0
26	2011-07-30	0
26	2011-07-31	0
26	2011-08-01	0
26	2011-08-02	0
26	2011-08-03	0
26	2011-08-04	0
26	2011-08-05	0
26	2011-08-06	0
26	2011-08-07	0
26	2011-08-08	0
26	2011-08-09	0
27	2011-06-03	148
27	2011-06-04	8
27	2011-06-05	570
27	2011-06-06	809
27	2011-06-07	771
27	2011-06-08	33
27	2011-06-09	0
27	2011-06-10	0
27	2011-06-11	0
27	2011-06-12	0
27	2011-06-13	37
27	2011-06-14	0
27	2011-06-15	0
27	2011-06-16	0
27	2011-06-17	0
27	2011-06-18	0
27	2011-06-19	0
27	2011-06-20	0
27	2011-06-21	0
27	2011-06-22	143
27	2011-06-23	6
27	2011-06-24	0
27	2011-06-25	0
27	2011-06-26	0
27	2011-06-27	0
27	2011-06-28	0
27	2011-06-29	0
27	2011-06-30	0
27	2011-07-01	0
27	2011-07-02	0
27	2011-07-03	0
27	2011-07-04	0
27	2011-07-05	0
27	2011-07-06	0
27	2011-07-07	0
27	2011-07-08	0
27	2011-07-09	0
27	2011-07-10	0
27	2011-07-11	0
27	2011-07-12	0
27	2011-07-13	0
27	2011-07-14	0
27	2011-07-15	0
27	2011-07-16	0
27	2011-07-17	0
27	2011-07-18	0
27	2011-07-19	0
27	2011-07-20	0
27	2011-07-21	0
27	2011-07-22	0
27	2011-07-23	0
27	2011-07-24	0
27	2011-07-25	126
27	2011-07-26	0
27	2011-07-27	0
27	2011-07-28	0
27	2011-07-29	0
27	2011-07-30	0
27	2011-07-31	243
27	2011-08-01	97
27	2011-08-02	0
27	2011-08-03	0
27	2011-08-04	0
27	2011-08-05	0
27	2011-08-06	0
27	2011-08-07	0
27	2011-08-08	0
27	2011-08-09	0
27	2011-08-10	0
27	2011-08-11	0
27	2011-08-12	0
27	2011-08-13	0
27	2011-08-14	0
27	2011-08-15	0
27	2011-08-16	0
27	2011-08-17	169
27	2011-08-18	0
27	2011-08-19	0
27	2011-08-20	0
27	2011-08-21	0
27	2011-08-22	0
27	2011-08-23	0
27	2011-08-24	0
27	2011-08-25	0
27	2011-08-26	0
27	2011-08-27	0
27	2011-08-28	0
27	2011-08-29	0
27	2011-08-30	0
27	2011-08-31	0
27	2011-09-01	0
27	2011-09-02	0
27	2011-09-03	0
27	2011-09-04	0
27	2011-09-05	0
27	2011-09-06	0
27	2011-09-07	0
27	2011-09-08	0
27	2011-09-09	0
27	2011-09-10	0
27	2011-09-11	0
27	2011-09-12	0
27	2011-09-13	0
27	2011-09-14	0
27	2011-09-15	0
27	2011-09-16	0
27	2011-09-17	0
28	2011-06-03	0
28	2011-06-04	0
28	2011-06-05	0
28	2011-06-06	0
28	2011-06-07	0
28	2011-06-08	0
28	2011-06-09	0
28	2011-06-10	0
28	2011-06-11	0
28	2011-06-12	0
28	2011-06-13	0
28	2011-06-14	0
28	2011-06-15	23
28	2011-06-16	0
28	2011-06-17	0
28	2011-06-18	0
28	2011-06-19	0
28	2011-06-20	0
28	2011-06-21	0
28	2011-06-22	0
28	2011-06-23	0
28	2011-06-24	0
28	2011-06-25	0
28	2011-06-26	0
28	2011-06-27	0
28	2011-06-28	0
28	2011-06-29	0
28	2011-06-30	0
28	2011-07-01	0
28	2011-07-02	0
28	2011-07-03	0
28	2011-07-04	0
28	2011-07-05	0
28	2011-07-06	0
28	2011-07-07	0
28	2011-07-08	0
28	2011-07-09	0
28	2011-07-10	0
28	2011-07-11	0
28	2011-07-12	0
28	2011-07-13	0
28	2011-07-14	0
28	2011-07-15	0
28	2011-07-16	0
28	2011-07-17	0
28	2011-07-18	0
28	2011-07-19	0
28	2011-07-20	0
28	2011-07-21	0
28	2011-07-22	0
28	2011-07-23	0
28	2011-07-24	0
28	2011-07-25	0
28	2011-07-26	0
28	2011-07-27	0
28	2011-07-28	0
28	2011-07-29	0
28	2011-07-30	0
28	2011-07-31	0
28	2011-08-01	0
28	2011-08-02	0
28	2011-08-03	0
28	2011-08-04	0
28	2011-08-05	0
28	2011-08-06	0
28	2011-08-07	0
28	2011-08-08	0
28	2011-08-09	0
28	2011-08-10	0
28	2011-08-11	0
28	2011-08-12	0
28	2011-08-13	0
28	2011-08-14	0
28	2011-08-15	0
28	2011-08-16	0
28	2011-08-17	0
28	2011-08-18	0
28	2011-08-19	0
28	2011-08-20	0
28	2011-08-21	0
28	2011-08-22	0
28	2011-08-23	0
28	2011-08-24	0
28	2011-08-25	0
28	2011-08-26	0
28	2011-08-27	0
28	2011-08-28	0
28	2011-08-29	0
28	2011-08-30	0
28	2011-08-31	0
28	2011-09-01	0
28	2011-09-02	0
29	2011-06-03	0
29	2011-06-04	0
29	2011-06-05	73
29	2011-06-06	0
29	2011-06-07	0
29	2011-06-08	0
29	2011-06-09	0
29	2011-06-10	0
29	2011-06-11	0
29	2011-06-12	0
29	2011-06-13	0
29	2011-06-14	0
29	2011-06-15	0
29	2011-06-16	0
29	2011-06-17	0
29	2011-06-18	0
29	2011-06-19	0
29	2011-06-20	0
29	2011-06-21	0
29	2011-06-22	0
29	2011-06-23	0
29	2011-06-24	0
29	2011-06-25	0
29	2011-06-26	0
29	2011-06-27	0
29	2011-06-28	0
29	2011-06-29	0
29	2011-06-30	0
29	2011-07-01	0
29	2011-07-02	0
29	2011-07-03	0
29	2011-07-04	0
29	2011-07-05	0
29	2011-07-06	0
29	2011-07-07	0
29	2011-07-08	0
29	2011-07-09	0
29	2011-07-10	0
29	2011-07-11	0
29	2011-07-12	0
29	2011-07-13	0
29	2011-07-14	0
29	2011-07-15	0
29	2011-07-16	0
29	2011-07-17	0
29	2011-07-18	0
29	2011-07-19	0
29	2011-07-20	0
29	2011-07-21	0
29	2011-07-22	0
29	2011-07-23	0
29	2011-07-24	0
29	2011-07-25	0
29	2011-07-26	0
29	2011-07-27	0
29	2011-07-28	0
29	2011-07-29	557
29	2011-07-30	0
29	2011-07-31	0
29	2011-08-01	0
29	2011-08-02	0
29	2011-08-03	0
29	2011-08-04	0
29	2011-08-05	0
29	2011-08-06	0
29	2011-08-07	0
29	2011-08-08	0
29	2011-08-09	32
29	2011-08-10	0
29	2011-08-11	0
29	2011-08-12	0
29	2011-08-13	0
29	2011-08-14	0
30	2011-06-03	0
30	2011-06-04	0
30	2011-06-05	0
30	2011-06-06	0
30	2011-06-07	0
30	2011-06-08	0
30	2011-06-09	0
30	2011-06-10	0
30	2011-06-11	0
30	2011-06-12	123
30	2011-06-13	0
30	2011-06-14	234
30	2011-06-15	459
30	2011-06-16	0
30	2011-06-17	0
30	2011-06-18	0
30	2011-06-19	0
30	2011-06-20	0
30	2011-06-21	2123
30	2011-06-22	76
30	2011-06-23	0
30	2011-06-24	0
30	2011-06-25	101
30	2011-06-26	0
30	2011-06-27	0
30	2011-06-28	0
30	2011-06-29	265
30	2011-06-30	0
30	2011-07-01	0
30	2011-07-02	29
30	2011-07-03	36
30	2011-07-04	0
30	2011-07-05	8
30	2011-07-06	0
30	2011-07-07	36
30	2011-07-08	0
30	2011-07-09	0
30	2011-07-10	0
30	2011-07-11	0
30	2011-07-12	0
30	2011-07-13	35
30	2011-07-14	0
30	2011-07-15	0
30	2011-07-16	0
30	2011-07-17	26
30	2011-07-18	0
30	2011-07-19	0
30	2011-07-20	46
30	2011-07-21	0
30	2011-07-22	0
30	2011-07-23	36
30	2011-07-24	88
30	2011-07-25	0
30	2011-07-26	444
30	2011-07-27	1837
30	2011-07-28	0
30	2011-07-29	0
30	2011-07-30	0
30	2011-07-31	0
30	2011-08-01	0
30	2011-08-02	0
30	2011-08-03	0
30	2011-08-04	0
30	2011-08-05	0
30	2011-08-06	0
30	2011-08-07	26
30	2011-08-08	0
30	2011-08-09	0
30	2011-08-10	26
30	2011-08-11	0
30	2011-08-12	5
30	2011-08-13	0
30	2011-08-14	0
30	2011-08-15	14
30	2011-08-16	0
30	2011-08-17	0
30	2011-08-18	0
30	2011-08-19	0
30	2011-08-20	0
30	2011-08-21	0
30	2011-08-22	0
30	2011-08-23	0
30	2011-08-24	0
30	2011-08-25	0
30	2011-08-26	0
30	2011-08-27	0
30	2011-08-28	0
30	2011-08-29	0
30	2011-08-30	0
30	2011-08-31	0
30	2011-09-01	0
31	2011-06-03	864
31	2011-06-04	87
31	2011-06-05	71
31	2011-06-06	645
31	2011-06-07	711
31	2011-06-08	740
31	2011-06-09	1641
31	2011-06-10	1015
31	2011-06-11	151
31	2011-06-12	815
31	2011-06-13	19
31	2011-06-14	57
31	2011-06-15	107
31	2011-06-16	238
31	2011-06-17	894
31	2011-06-18	121
31	2011-06-19	214
31	2011-06-20	633
31	2011-06-21	480
31	2011-06-22	434
31	2011-06-23	3306
31	2011-06-24	2088
31	2011-06-25	1209
31	2011-06-26	557
31	2011-06-27	663
31	2011-06-28	3768
31	2011-06-29	329
31	2011-06-30	158
31	2011-07-01	1403
31	2011-07-02	632
31	2011-07-03	438
31	2011-07-04	69
31	2011-07-05	1154
31	2011-07-06	127
31	2011-07-07	675
31	2011-07-08	2367
31	2011-07-09	756
31	2011-07-10	1153
31	2011-07-11	356
31	2011-07-12	737
31	2011-07-13	445
31	2011-07-14	44
31	2011-07-15	331
31	2011-07-16	57
31	2011-07-17	17
31	2011-07-18	586
31	2011-07-19	242
31	2011-07-20	204
31	2011-07-21	248
31	2011-07-22	8
31	2011-07-23	930
31	2011-07-24	990
31	2011-07-25	313
31	2011-07-26	2588
31	2011-07-27	146
31	2011-07-28	0
31	2011-07-29	329
31	2011-07-30	0
31	2011-07-31	83
31	2011-08-01	0
31	2011-08-02	11
31	2011-08-03	102
31	2011-08-04	65
31	2011-08-05	0
[truncated: 24,508 more rows]

## Sheet: Sampling sites
Site	Longitude	Latitude
1	-114.428	31.0754
2	-114.515	30.9747
3	-114.498	31.0171
4	-114.481	31.0594
5	-114.464	31.1018
6	-114.447	31.1442
7	-114.43	31.1865
8	-114.413	31.2289
9	-114.432	31.2976
10	-114.449	31.2552
11	-114.466	31.2129
12	-114.483	31.1705
13	-114.5	31.1282
14	-114.517	31.0858
15	-114.534	31.0434
16	-114.551	31.0011
18	-114.587	31.0274
19	-114.57	31.0698
20	-114.553	31.1122
21	-114.536	31.1545
22	-114.519	31.1969
23	-114.502	31.2392
24	-114.485	31.2816
25	-114.468	31.3239
26	-114.504	31.3503
27	-114.538	31.2656
28	-114.555	31.2232
29	-114.572	31.1809
30	-114.589	31.1385
31	-114.606	31.0962
32	-114.623	31.0538
34	-114.659	31.0802
35	-114.642	31.1225
36	-114.625	31.1649
37	-114.608	31.2072
38	-114.591	31.2496
39	-114.574	31.2919
40	-114.627	31.2759
41	-114.644	31.2336
42	-114.661	31.1912
43	-114.678	31.1489
44	-114.695	31.1065
45	-114.696	31.2176
46	-114.68	31.2599
47	-114.663	31.3023
48	-114.715	31.2863
